# Supplementary material
Source: publisher site journal article supplement (https://www.dovepress.com/article/495119)
Supplement: Supplementary file 1 [file get_supplementary_file.php]

**Supporting Information**


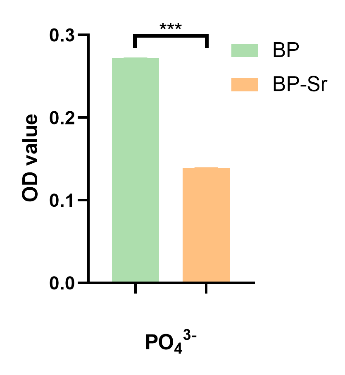


Supporting Information, Figure S1. The release of phosphate (PO43−). Data are presented as mean ± SD (***P < 0.001).


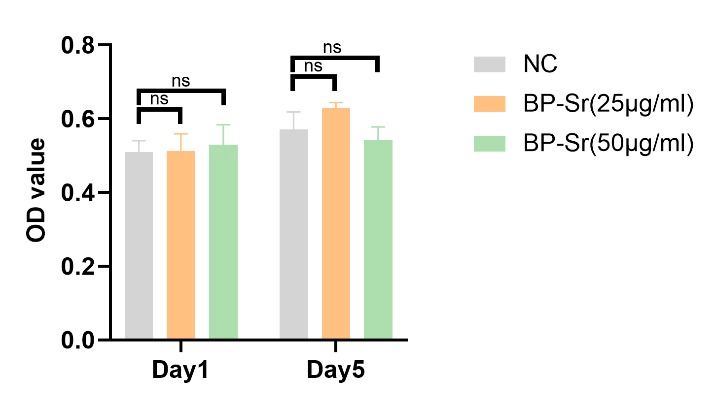


Supporting Information, Figure S2. The results of CCK8 after 5 days. Data are presented as mean ± SD (ns P > 0.05).


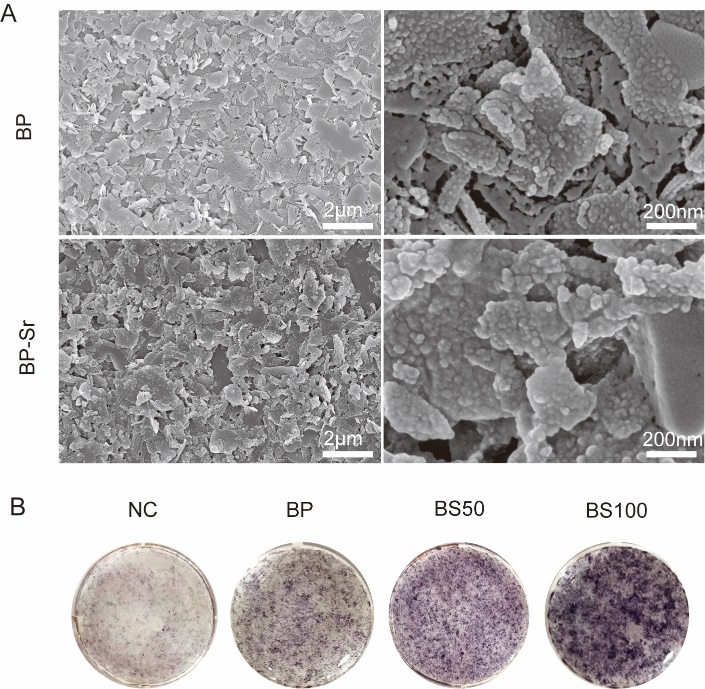


Supporting Information, Figure S3. The osteogenic potential of BP-Sr. (A) The SEM images of BP and BP-Sr which were soaked in the SBF for 2 weeks. (B) ALP staining of BP and BP-Sr.


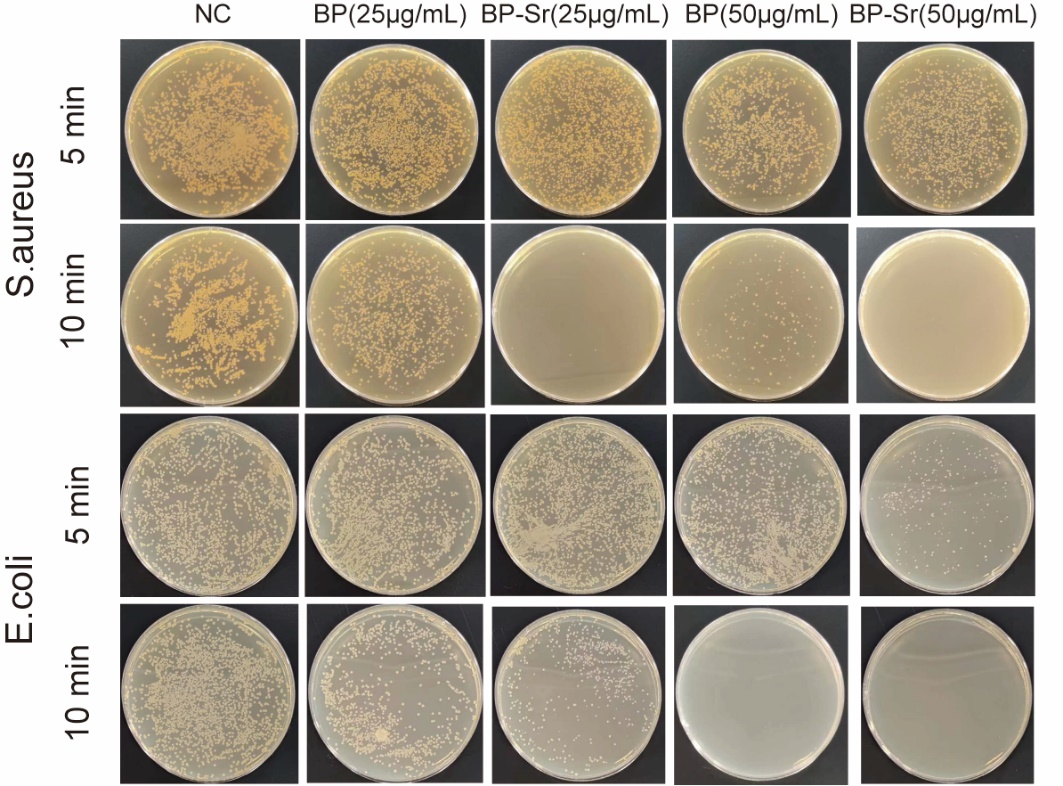


Supporting Information, Figure S4. Images of agar culture plate bacterial colonies in different groups.


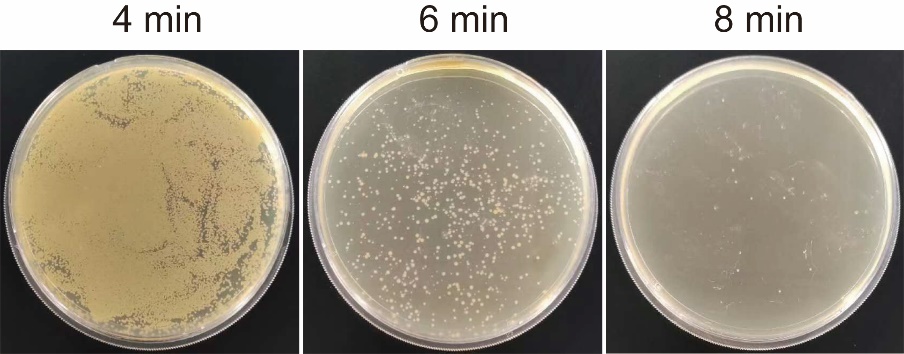


Supporting Information, Figure S5. The choice of stimulation time before RNA-seq.


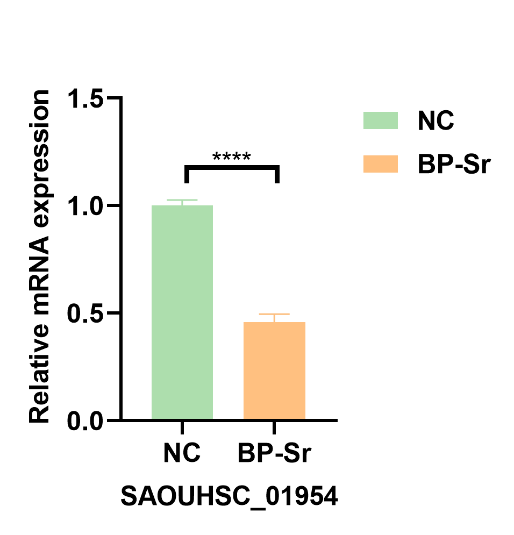


Supporting Information, Figure S6. Genes related to leukotoxin was downregulated. Data are presented as mean ± SD (****P < 0.0001).
